# Supplementary material for: Eighteen New Aeruginosamide Variants Produced by the Baltic Cyanobacterium Limnoraphis CCNP1324
Source: PubMed Central journal article supplement (PMC7551963; doi:10.3390/md18090446), 2020-08-27
Supplement: marinedrugs-18-00446-s001.pdf [file marinedrugs-18-00446-s001.pdf]

## Supplementary Material: Eighteen new aeruginosamide variants produced by the Baltic cyanobacterium *Limnoraphis* CCNP1324

Marta Ceglowska<sup>1</sup>, Karolia Szubert<sup>2</sup>, Ewa Wieczerek<sup>3</sup>, Alicja Kosakowska<sup>1</sup> and Hanna Mazur-Marzec<sup>2\*</sup>

<sup>1</sup> Institute of Oceanology, Polish Academy of Sciences, Powstańców Warszawy 55, PL-81712 Sopot, Poland; mceglowska@iopan.pl (M.C.), akosak@iopan.gda.pl (A.K.)

<sup>2</sup> Division of Marine Biotechnology, Faculty of Oceanography and Geography, University of Gdańsk, Marszałka J. Piłsudskiego 46, PL-81378 Gdynia, Poland; karolina.szubert@phdstud.ug.edu.pl

<sup>3</sup> Department of Biomedical Chemistry, Faculty of Chemistry, University of Gdańsk, Wita Stwosza 63, PL-80308 Gdańsk, Poland; ewa.wieczerek@ug.edu.pl

\* Correspondence: hanna.mazur-marzec@ug.edu.pl

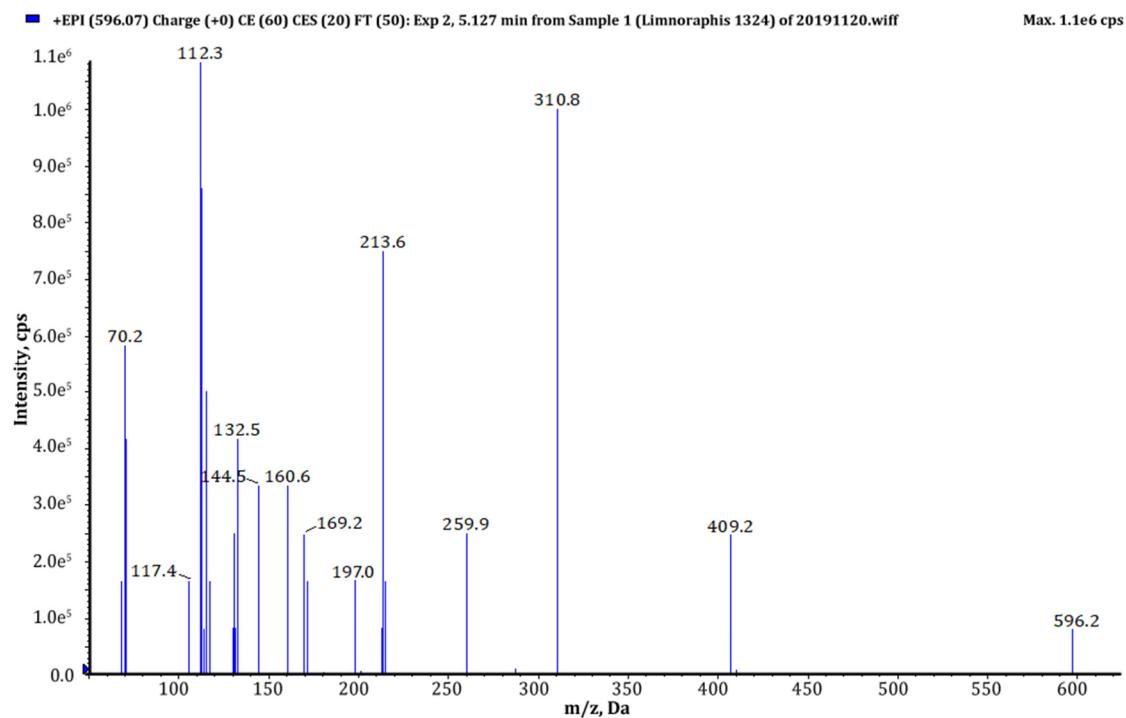

**Figure S1.** Enhanced product ion mass spectrum of aeruginosamide AER595 with general structure 187+Val+Pro+Pyr+TzlCOOMe identified based on the following fragment ions: 596 [M+H], 409 [Val+Pro+Pyr+TzlCOOMe], 310 [Pro+Pyr+TzlCOOMe+H], 259 [187+Val+H-CO], 213 [Pyr+TzlCOOMe+H], 197 [Val+Pro+H], 169 [Val+Pro+H-CO], 160 [187+H-CO], 144 [TzlCOOMe], 112 TzlCO, 70 Pro immonium ion.

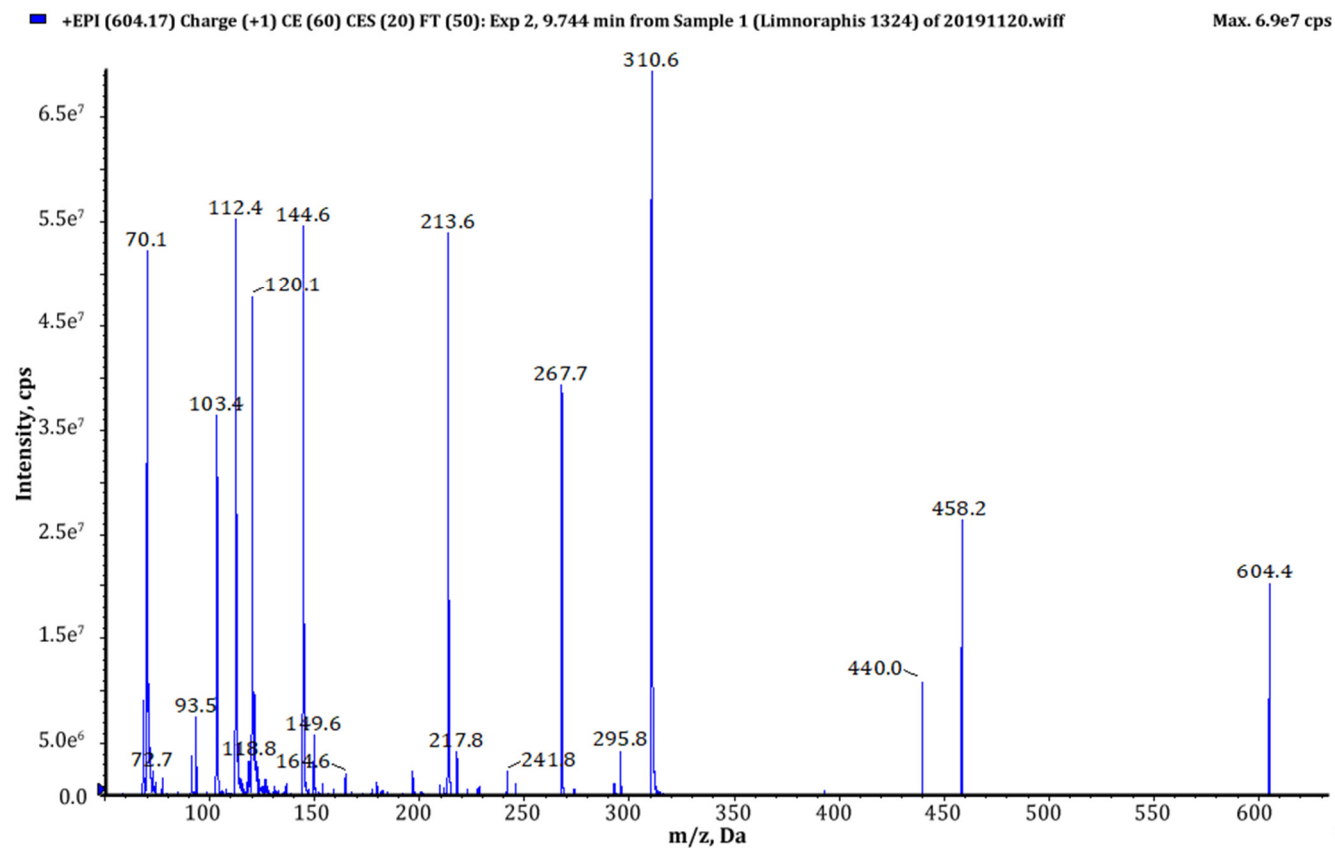

**Figure S2.** Enhanced product ion mass spectrum of aeruginosamide AEG603 with general structure Phe+Phe+Pro+Pyr+TzlCOOMe identified based on the following fragment ions: 604 [M+H], 458 [M+H-Phe], 310 [Pro+Pyr+TzlCOOMe+H], 295 [Phe+Phe+H], 267 [Phe+Phe+H-CO], 217 [Phe+Pro+H-CO], 213 [Pyr+TzlCOOMe+H], 144 [TzlCOOMe], 120 Phe immonium ion, 112 TzlCO, 70 Pro immonium ion.

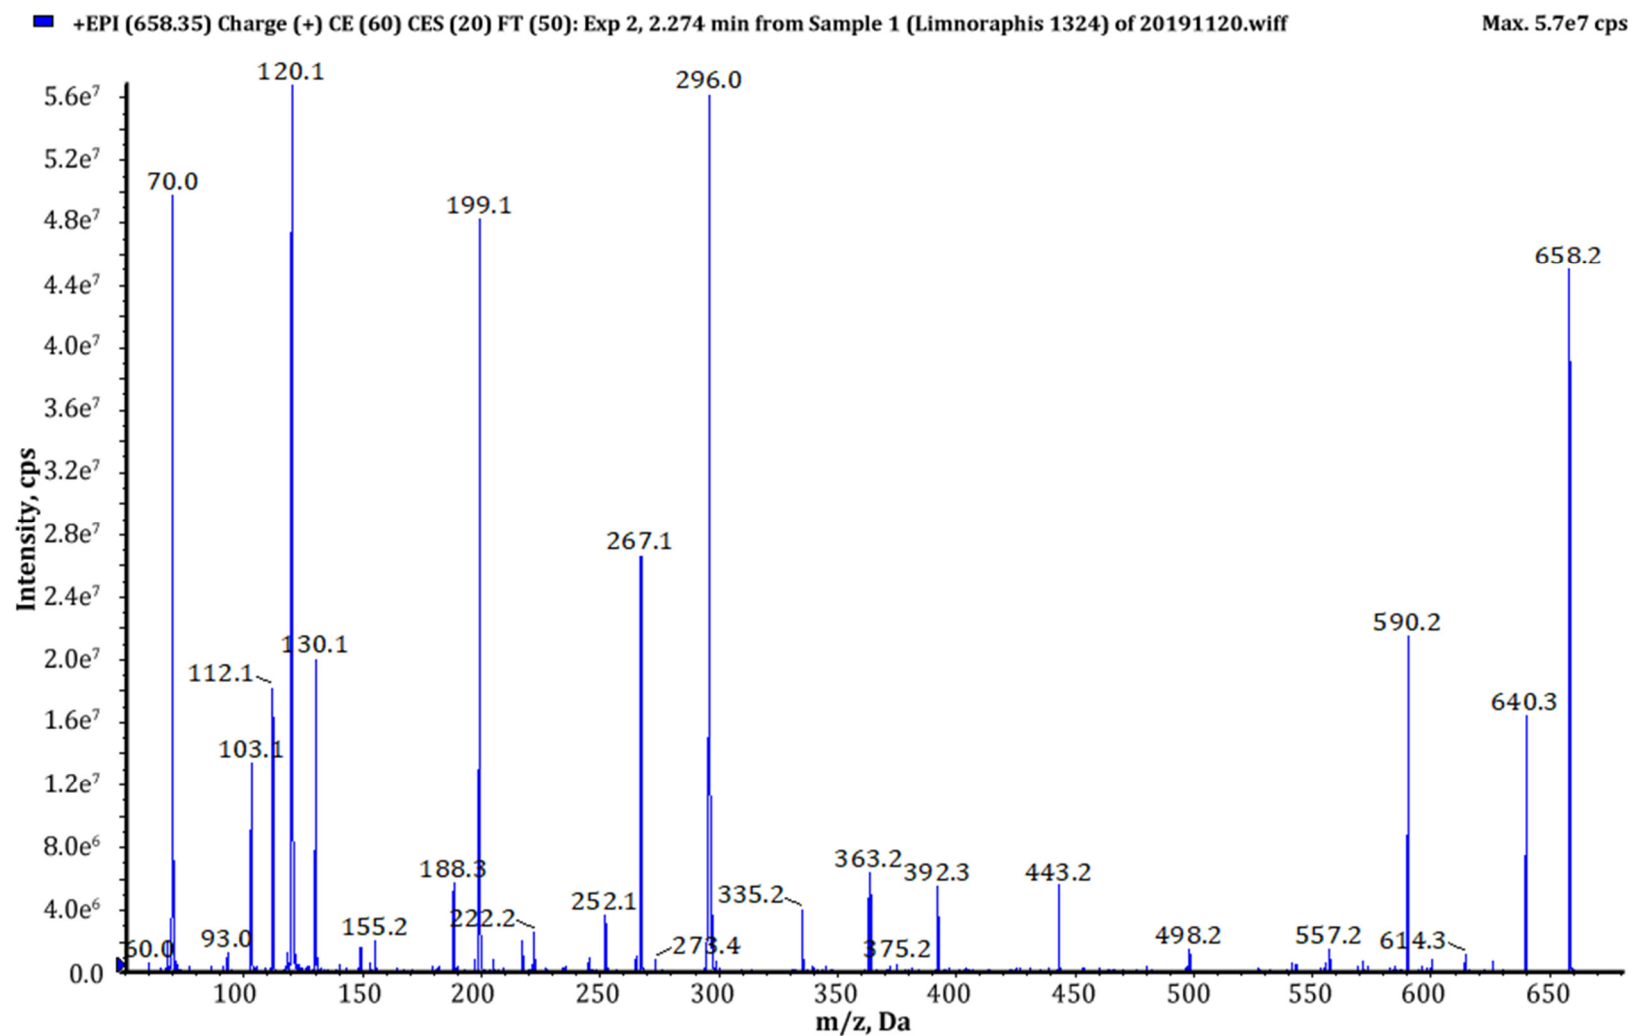

**Figure S3.** Enhanced product ion mass spectrum of aeruginosamide AEG657 with general structure Pre+Phe+Phe+Pro+Pyr+TzlCOOH identified based on the following fragment ions: 658 [M+H], 640 [M+H-H<sub>2</sub>O], 590 [M+H-Pre], 443 [M+H-(Pre+Phe)], 392 [Phe+Phe+Pro+H], 363 [Pre+Phe+Phe+H], 335 [Pre+Phe+Phe+H-CO], 296 [Pro+Pyr+TzlCOOH], 267 [Phe+Phe+H-CO], 199 [Pyr+TzlCOOH+H], 188 [Pre+Phe+H-CO], 130 [TzlCOOH], 120 Phe immonium ion, 112 TzlCO, 70 Pro immonium ion.

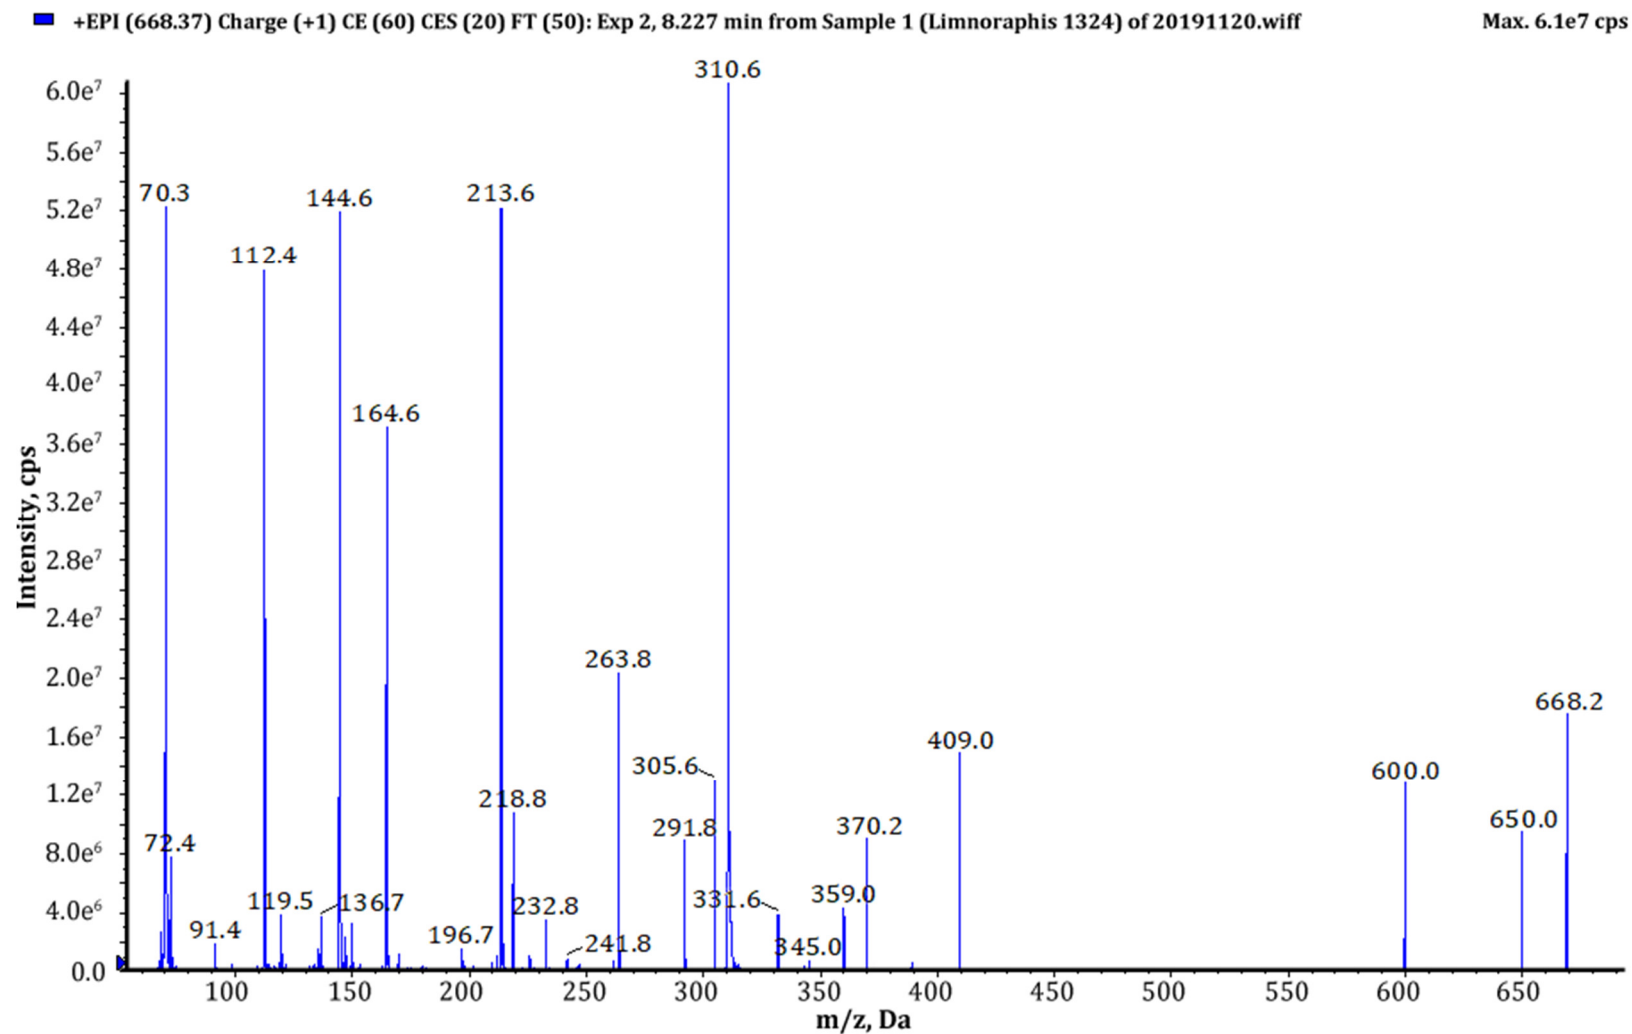

**Figure S4.** Enhanced product ion mass spectrum of aeruginosamide AER667 with general structure Pre+MeHTyr+Val+Pro+Pyr+TzlCOOMe identified based on the following fragment ions: 668 [M+H], 650 [M+H-H<sub>2</sub>O], 600 [M+H-Pre], 409 [Val+Pro+Pyr+TzlCOOMe], 370 [MeHTyr+Val+Pro+H-H<sub>2</sub>O], 359 [Pre+MeHTyr+Val+H], 331 [Pre+MeHTyr+Val+H-CO], 310 [Pro+Pyr+TzlCOOMe+H], 291 [MeHTyr+Val+H], 263 [MeHTyr+Val+H-CO], 213 [Pyr+TzlCOOMe+H], 164 MeHTyr immonium ion, 144 [TzlCOOMe], 112 TzlCO, 72 Val immonium ion, 70 Pro immonium ion.

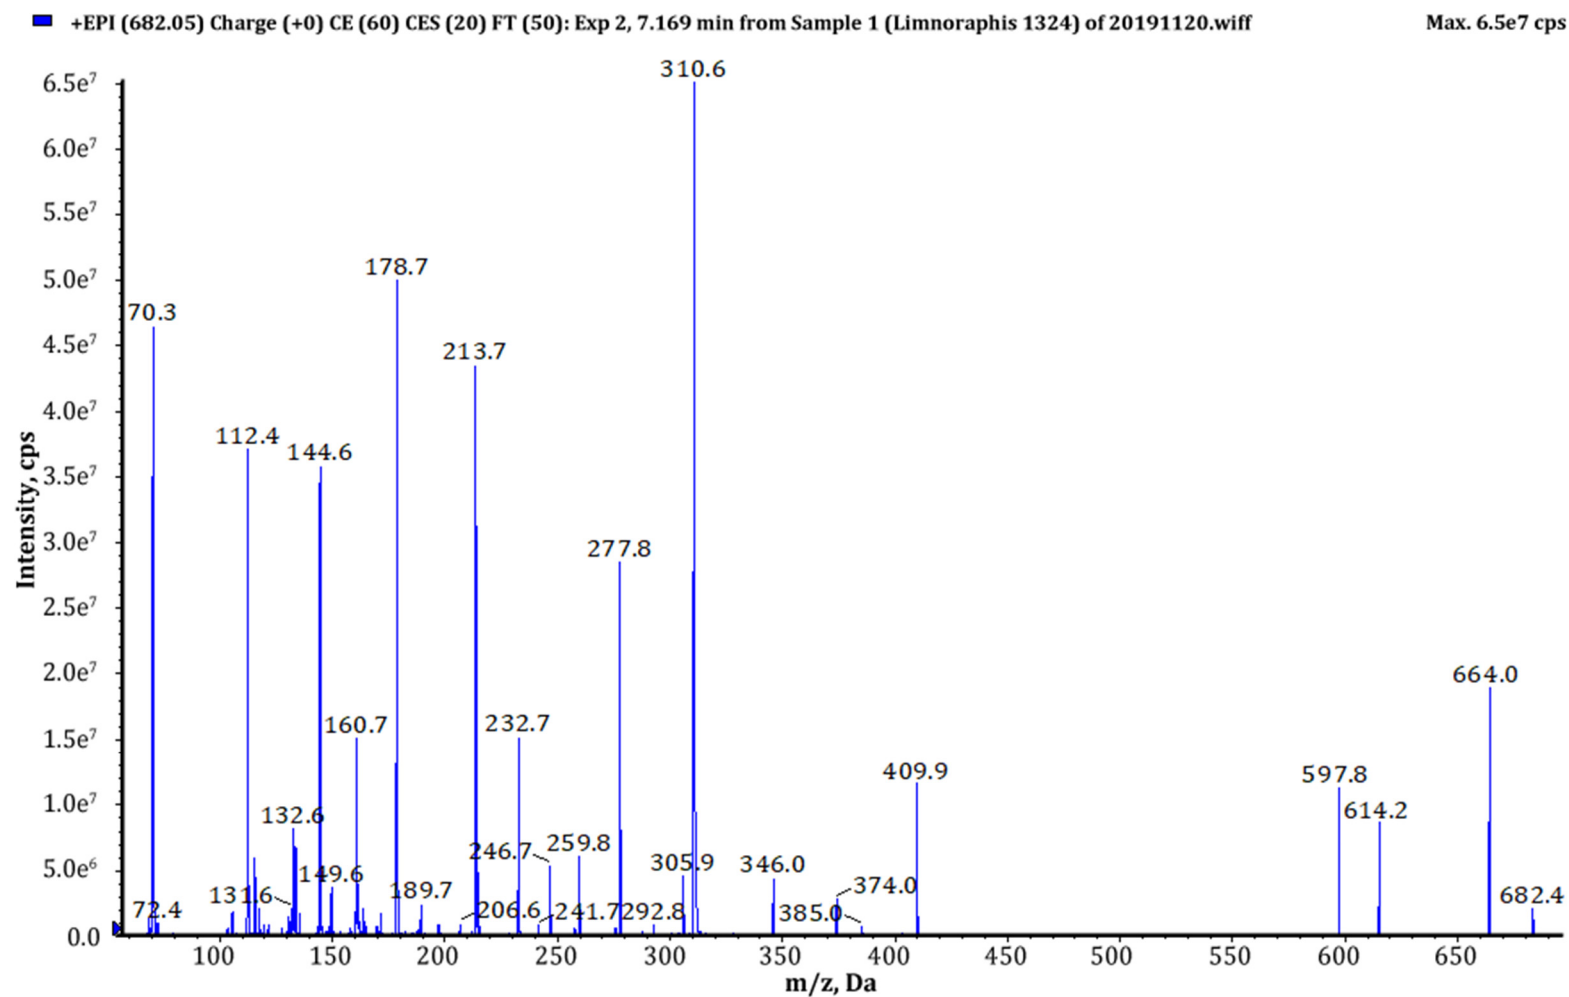

**Figure S5.** Enhanced product ion mass spectrum of aeruginosamide AER681a with general structure Pre+205+Val+Pro+Pyr+TzlCOOMe identified based on the following fragment ions: 682 [M+H], 664 [M+H-H<sub>2</sub>O], 614 [M+H-Pre], 409 [M+H-(Pre+205)], 374 [205+Val+Pro+H-CO], 310 [Pro+Pyr+TzlOMe+H], 305 [205+Val+H], 277 [205+Val+H-CO], 259 [205+Val+H-CO-H<sub>2</sub>O], 213 [Pyr+TzlCOOMe+H], 178 [205+H-CO], 144 [TzlCOOMe], 112 TzlCO, 72 Val immonium ion, 70 Pro immonium ion.

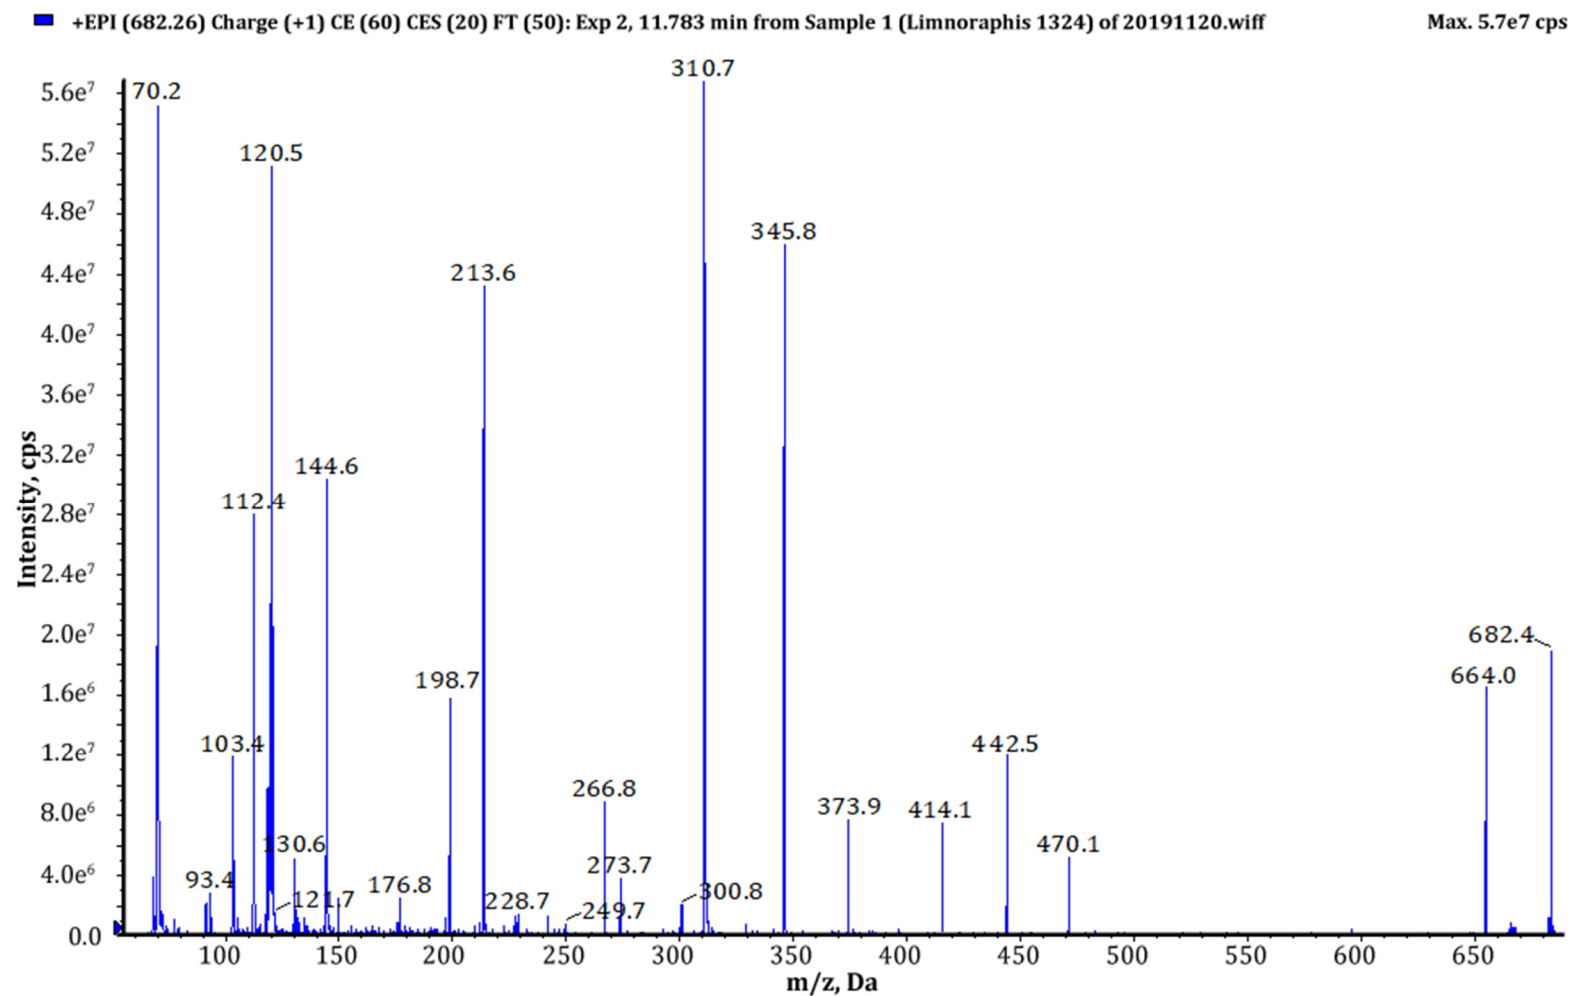

**Figure S6.** Enhanced product ion mass spectrum of aeruginosamide AER681b with general structure 225+Phe+Pro+Pyr+TzlCOOMe identified based on the following fragment ions: 682 [M+H], 664 [M+H-H<sub>2</sub>O], 470 [225+Phe+Pro+H], 442 [225+Phe+Pro+H-CO], 373 [225+Phe+H], 345 [225+Phe+H-CO], 310 [Pro+Pyr+TzlCOOMe+H], 228 [Pre+187+H-CO], 213 [Pyr+TzlOMe+H], 198 [225+H-CO], 144 [TzlCOOMe], 120 Phe immonium ion, 112 TzlCO, 70 Pro immonium ion.

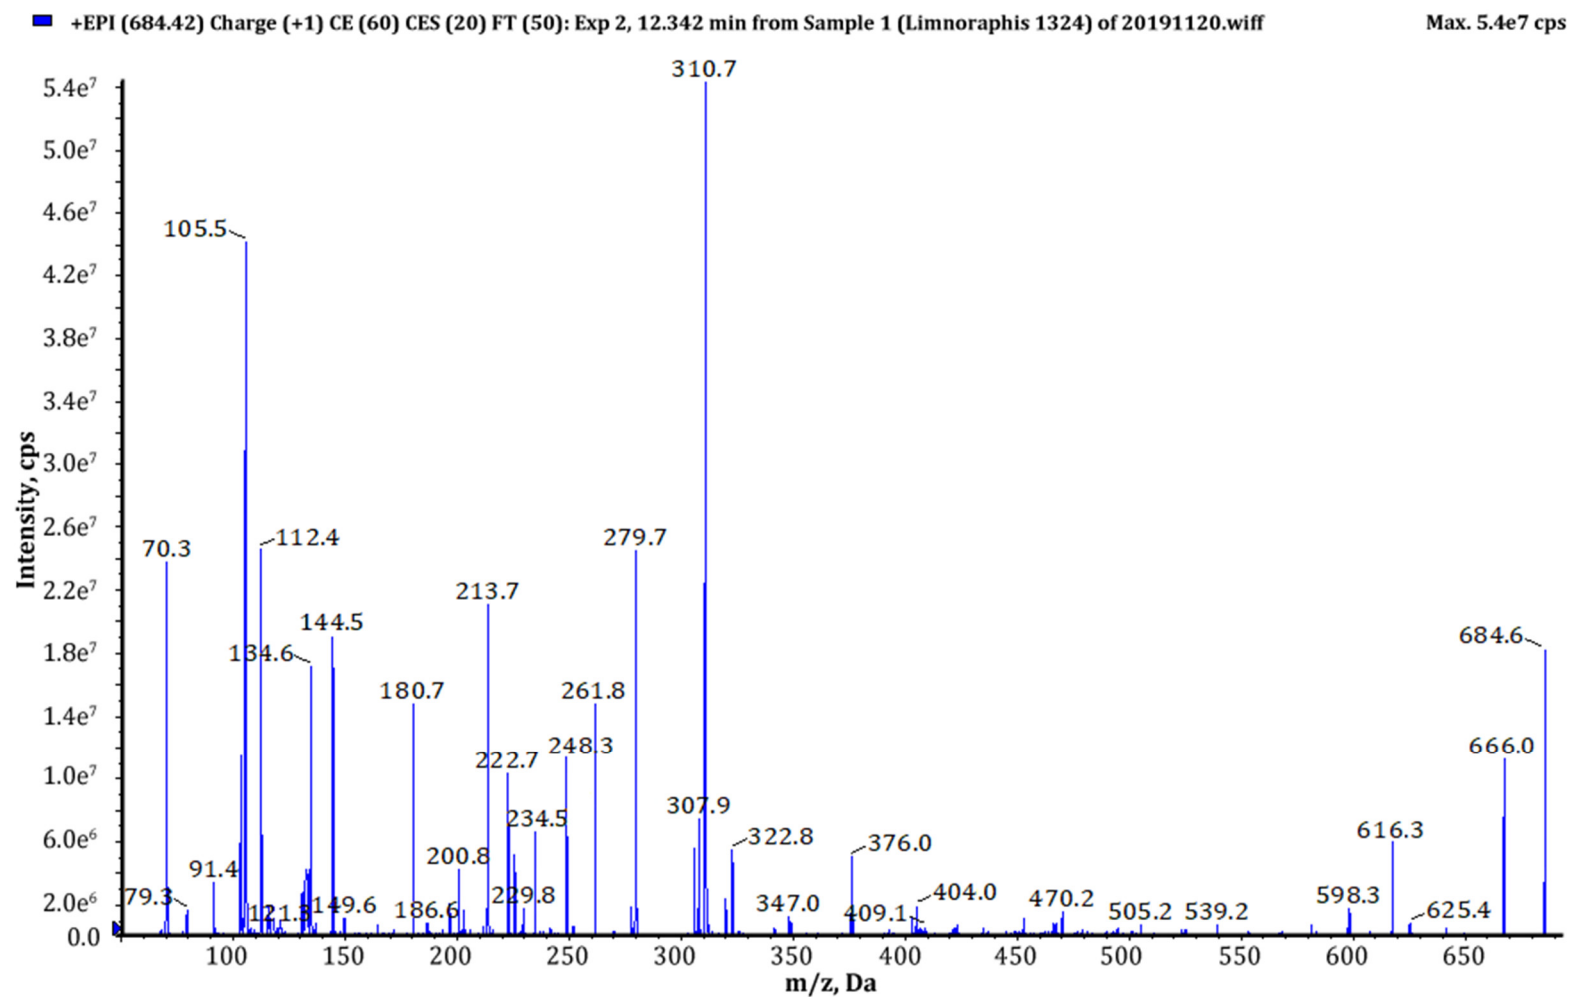

**Figure S7.** Enhanced product ion mass spectrum of aeruginosamide AER683 with general structure Pre+207+Val+Pro+Pyr+TzlCOOMe identified based on the following fragment ions: 684 [M+H], 666 [M+H-H<sub>2</sub>O], 616 [M+H-Pre], 598 [M+H-Pre-H<sub>2</sub>O], 409 [Val+Pro+Pyr+TzlCOOMe], 404 [207+Val+Pro+H], 376 [207+Val+Pro+H-CO], 310 [Pro+Pyr+TzlCOOMe+H], 307 [207+Val+H], 279 [207+Val+H-CO], 261 [207+Val+H-CO-H<sub>2</sub>O], 213 [Pyr+TzlCOOMe+H], 180 [207+H-CO], 144 [TzlCOOMe], 112 TzlCO, 70 Pro immonium ion.



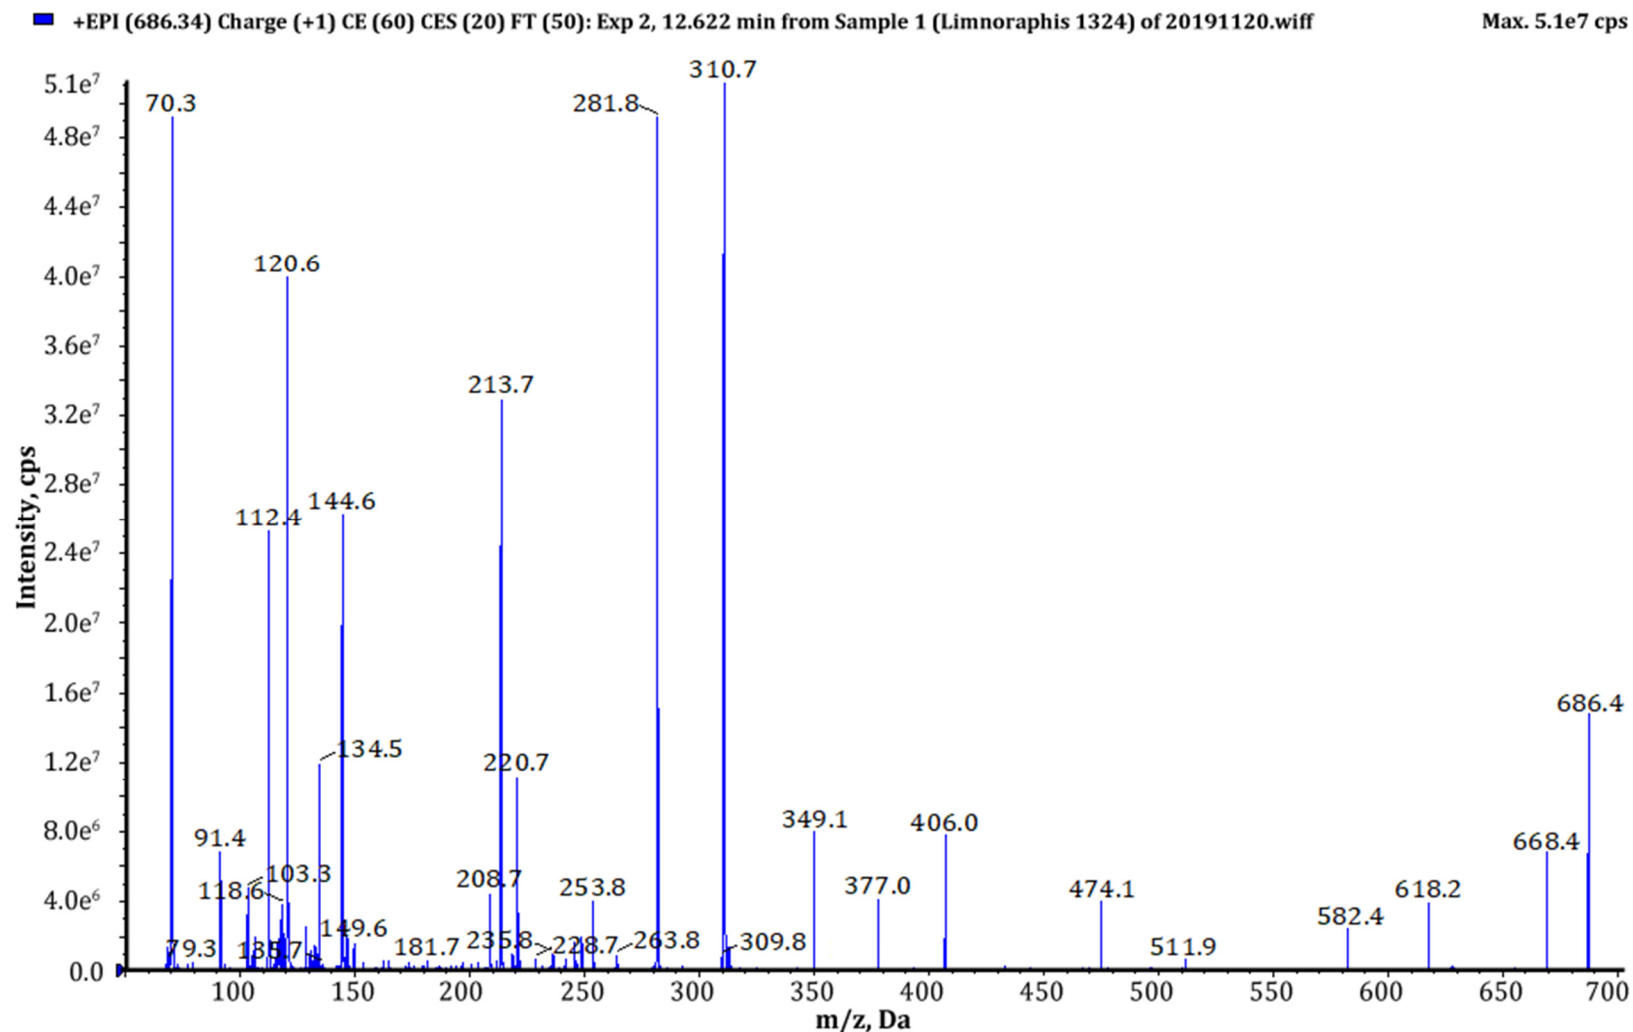

**Figure S8.** Enhanced product ion mass spectrum of aeruginosamide AER685 with general structure Pre+Phe+Hph/MeHph+Pro+Pyr+TzlCOOMe identified based on the following fragment ions: 686 [M+H], 668 [M+H-H<sub>2</sub>O], 618 [M+H-Pre], 474 [Pre+Phe+Hph/MeHph+Pro+H], 406 [Phe+Hph/MeHph+Pro+H], 377 [Pre+Phe+Hph/MeHph+H], 349 [Pre+Phe+Hph/MeHph+H-CO], 310 [Pro+Pyr+TzlCOOMe+H], 309 [Phe+Hph/MeHph+H], 281 [Phe+Hph/MeHph+H-CO], 213 [Pyr+TzlCOOMe+H], 144 [TzlCOOMe], 134 Hph/MeHph immonium ion, 120 Phe immonium ion, 112 TzlCO, 70 Pro immonium ion.

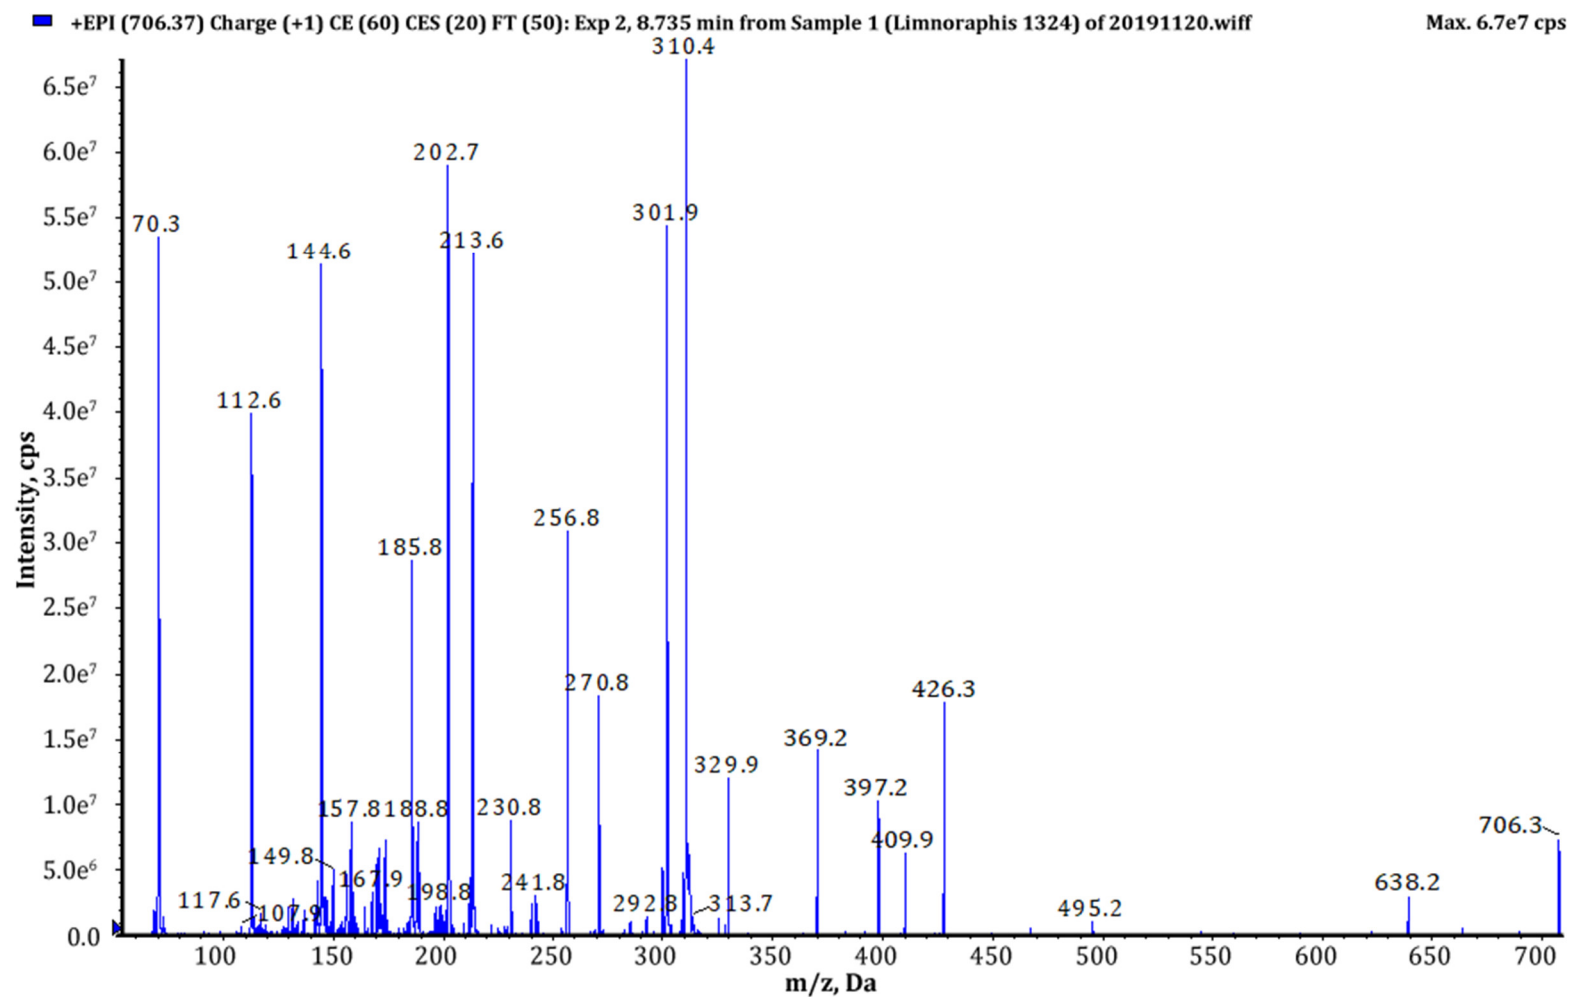

**Figure S9.** Enhanced product ion mass spectrum of aeruginosamide AEG705 with general structure  $(\text{Pre})_2+\text{Hph}/\text{MeHph}+\text{Val}+\text{Pro}+\text{Pyr}+\text{TzI}(\text{COOMe})$  identified based on the following fragment ions: 706 [M+H], 638 [M+H-Pre], 495 [Pre+Hph/MeHph+Val+Pro+Pyr+H], 426 [Pre+Hph/MeHph+Val+Pro+H], 409 [Val+Pro+Pyr+TzI(COOMe)], 397 [(Pre)<sub>2</sub>+Hph/MeHph+Val+H], 369 [(Pre)<sub>2</sub>+Hph/MeHph+Val+H-CO], 329 [Pre+Hph/MeHph+Val+H], 310 [Pro+Pyr+TzI(COOMe)+H], 301 [Pre+Hph/MeHph+Val+H-CO], 270 [(Pre)<sub>2</sub>+Hph/MeHph+H-CO], 230 [Pre+Hph/MeHph+H], 213 [Pyr+TzI(COOMe)+H], 202 [Pre+Hph/MeHph+H-CO], 144 [TzI(COOMe)], 112 TzI(CO), 70 Pro immonium ion.

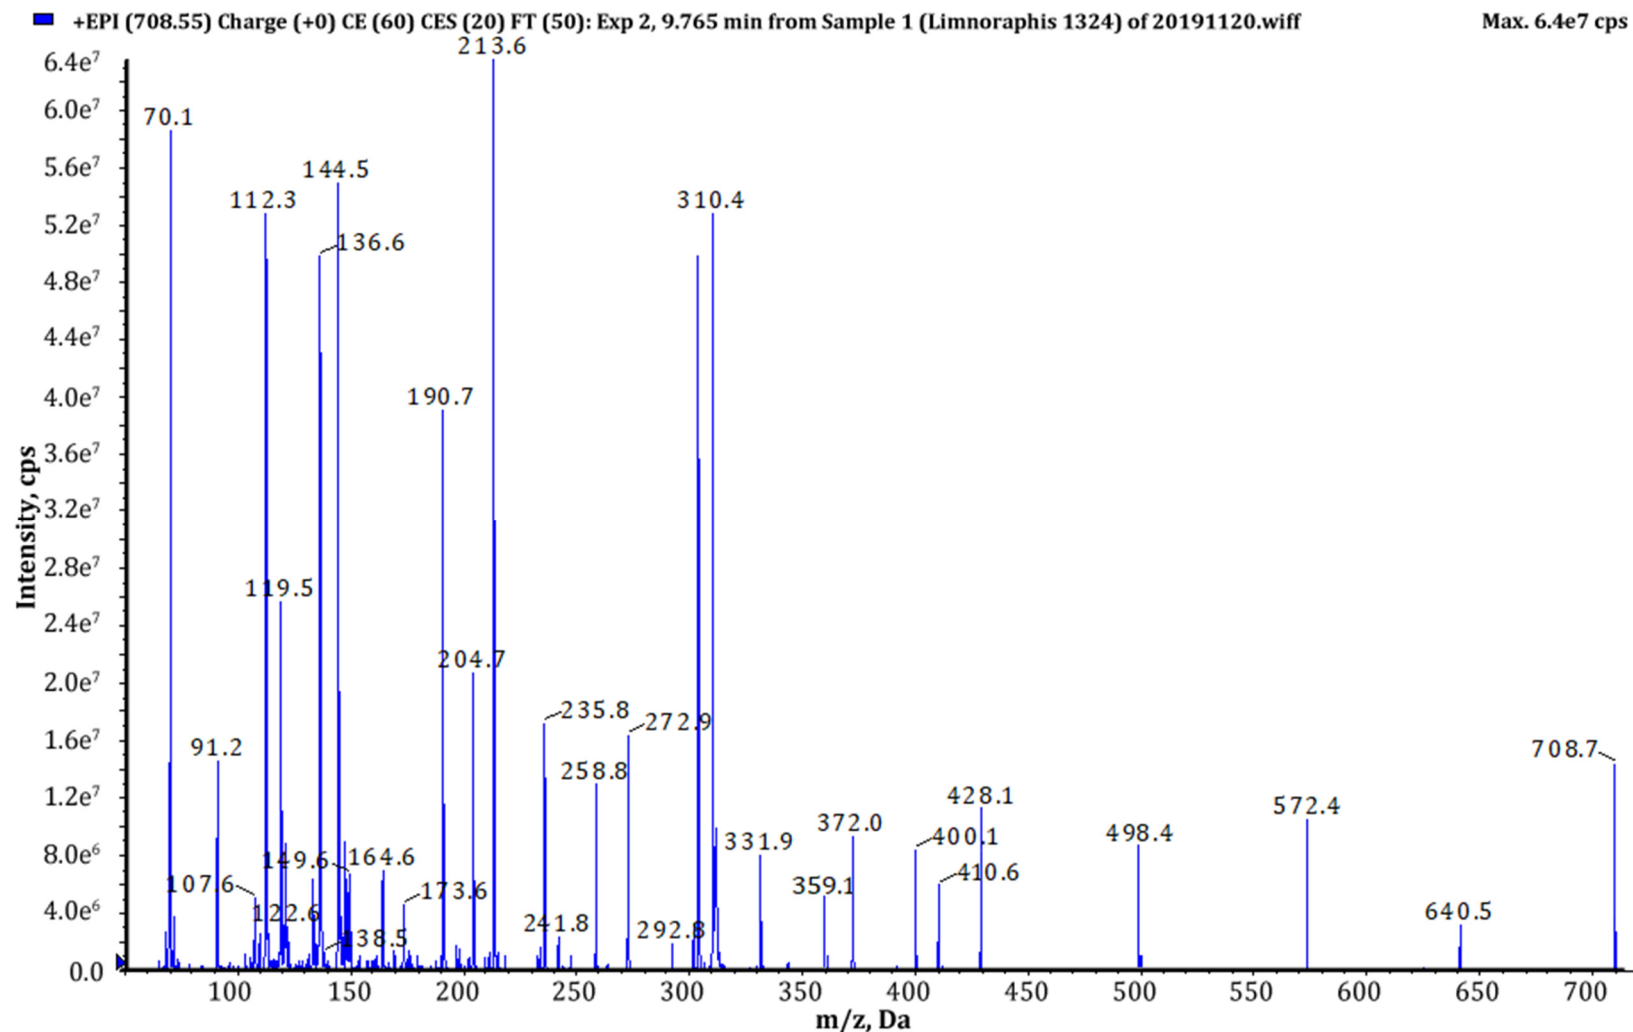

**Figure S10.** Enhanced product ion mass spectrum of aeruginosamide AEG707 with general structure  $(\text{Pre})_2\text{Tyr+Val+Pro+Pyr+TzlCOOMe}$  identified based on the following fragment ions: 708 [M+H], 640 [M+H-Pre], 572 [M+H-(Pre)<sub>2</sub>], 498 [M+H-Pre-TzlCOOMe], 429 [Tyr+Val+Pro+Pyr+H], 409 [Val+Pro+Pyr+TzlCOOMe], 400 [Pre+Tyr+Val+Pro+H-CO], 370 [(Pre)<sub>2</sub>+Tyr+Val+H-CO], 360 [Tyr+Val+Pro+H], 331 [Pre+Tyr+Val+H], 310 [Pro+Pyr+TzlCOOMe+H], 271 [(Pre)<sub>2</sub>+Tyr+H-CO], 235 [Tyr+Val+H-CO], 213 [Pyr+TzlCOOMe+H], 204 [Pre+Tyr+H-CO], 144 [TzlCOOMe], 136 Tyr immonium ion, 112 TzlCO, 70 Pro immonium ion.

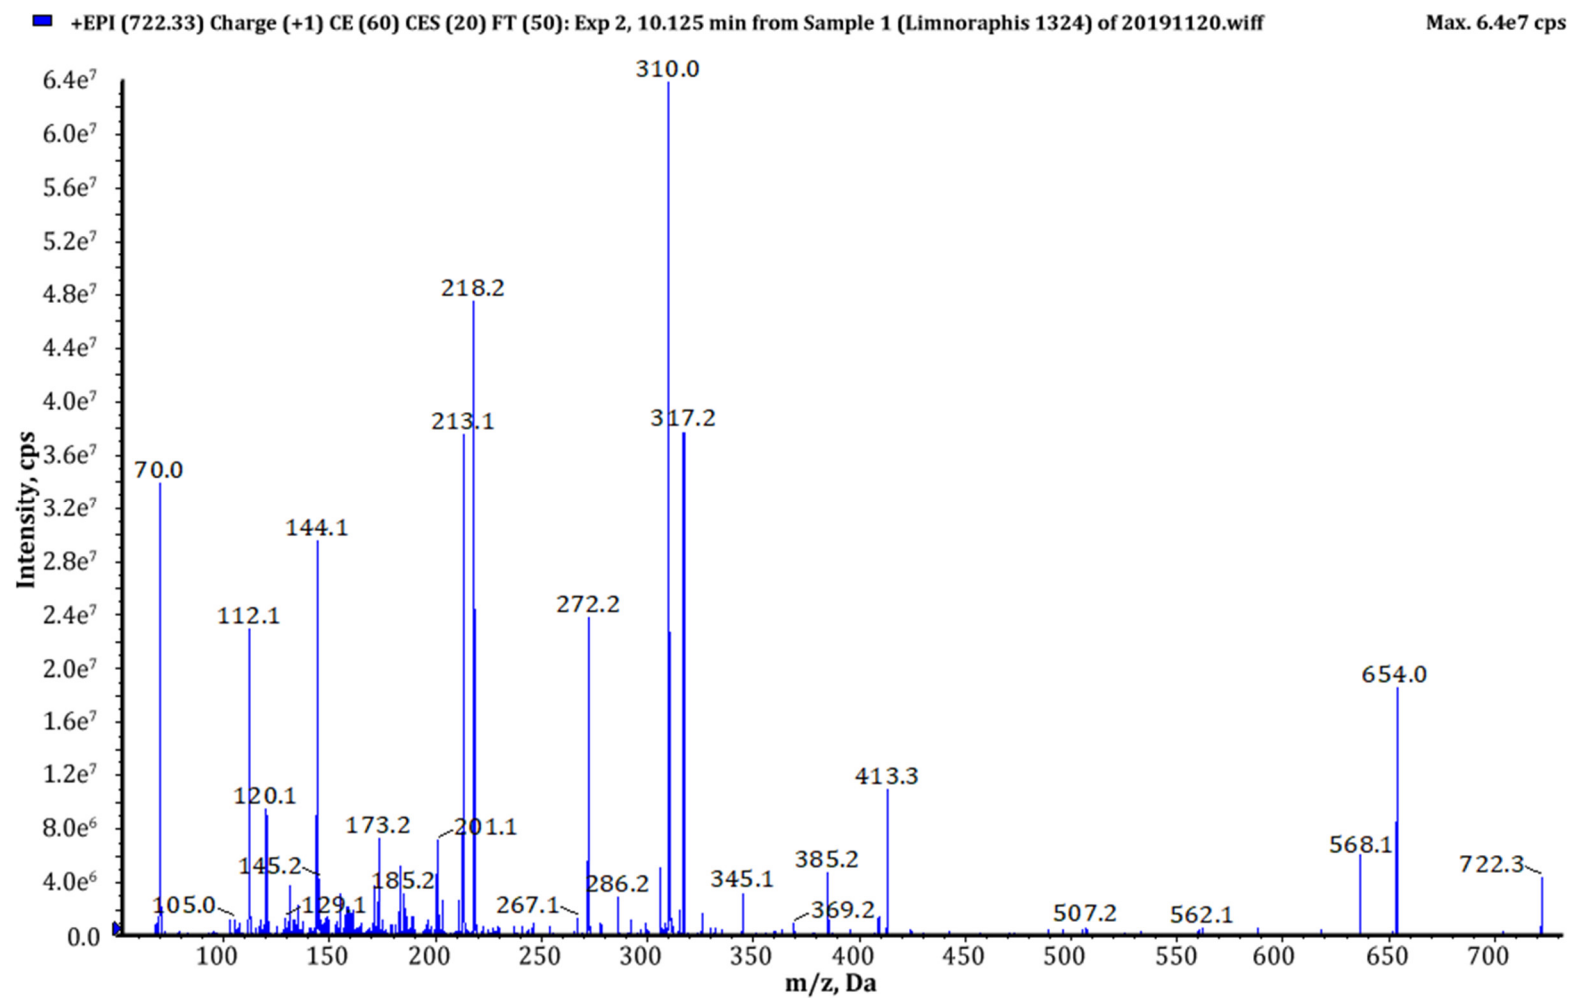

**Figure S11.** Enhanced product ion mass spectrum of aeruginosamide AEG721 with general structure  $(\text{Pre})_2+\text{Tyr}+\text{Ile}/\text{Leu}+\text{Pro}+\text{Pyr}+\text{TzlCOOMe}$  identified based on the following fragment ions: 722  $[\text{M}+\text{H}]$ , 654  $[\text{M}+\text{H}-\text{Pre}]$ , 586  $[\text{M}+\text{H}-(\text{Pre})_2]$ , 413  $[(\text{Pre})_2+\text{Tyr}+\text{Ile}/\text{Leu}+\text{H}]$ , 385  $[(\text{Pre})_2+\text{Tyr}+\text{Ile}/\text{Leu}+\text{H}-\text{CO}]$ , 345  $[\text{Pre}+\text{Tyr}+\text{Ile}/\text{Leu}+\text{H}]$ , 317  $[\text{Pre}+\text{Tyr}+\text{Ile}/\text{Leu}+\text{H}-\text{CO}]$ , 310  $[\text{Pro}+\text{Pyr}+\text{TzlOMe}+\text{H}]$ , 272  $[(\text{Pre})_2+\text{Tyr}+\text{H}-\text{CO}]$ , 213  $[\text{Pyr}+\text{TzlCOOMe}+\text{H}]$ , 144  $[\text{TzlCOOMe}]$ , 112  $\text{TzlCO}$ , 70  $\text{Pro}$  immonium ion.

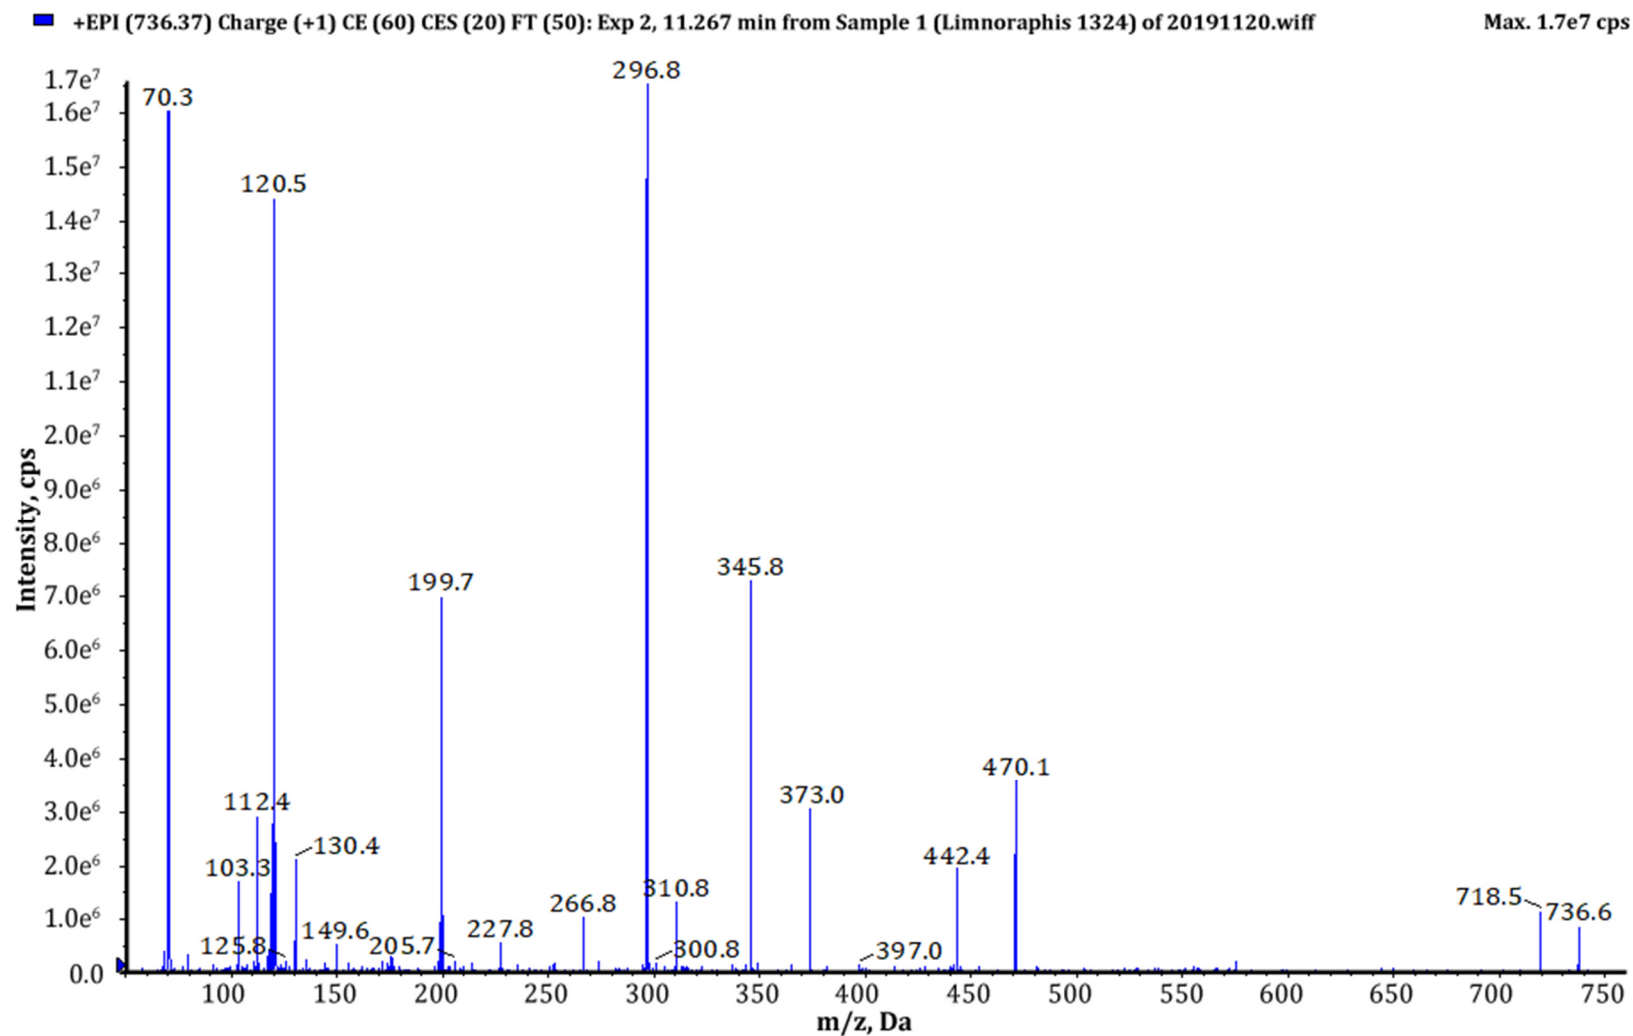

**Figure S12.** Enhanced product ion mass spectrum of aeruginosamide AER735 with general structure Pre+225+Phe+Pro+Pyr+TzlCOOH identified based on the following fragment ions: 736 [M+H], 718 [M+H-H<sub>2</sub>O], 470 [225+Phe+Pro+H], 442 [225+Phe+Pro+H-CO], 373 [225+Phe+H], 345 [225+Phe+H-CO], 296 [Pro+Pyr+TzlCOOH+H], 266 [Pre+225+H-CO], 199 [Pyr+TzlCOOH+H], 130 [TzlCOOH], 120 Phe immonium ion, 112 TzlCO, 70 Pro immonium ion.

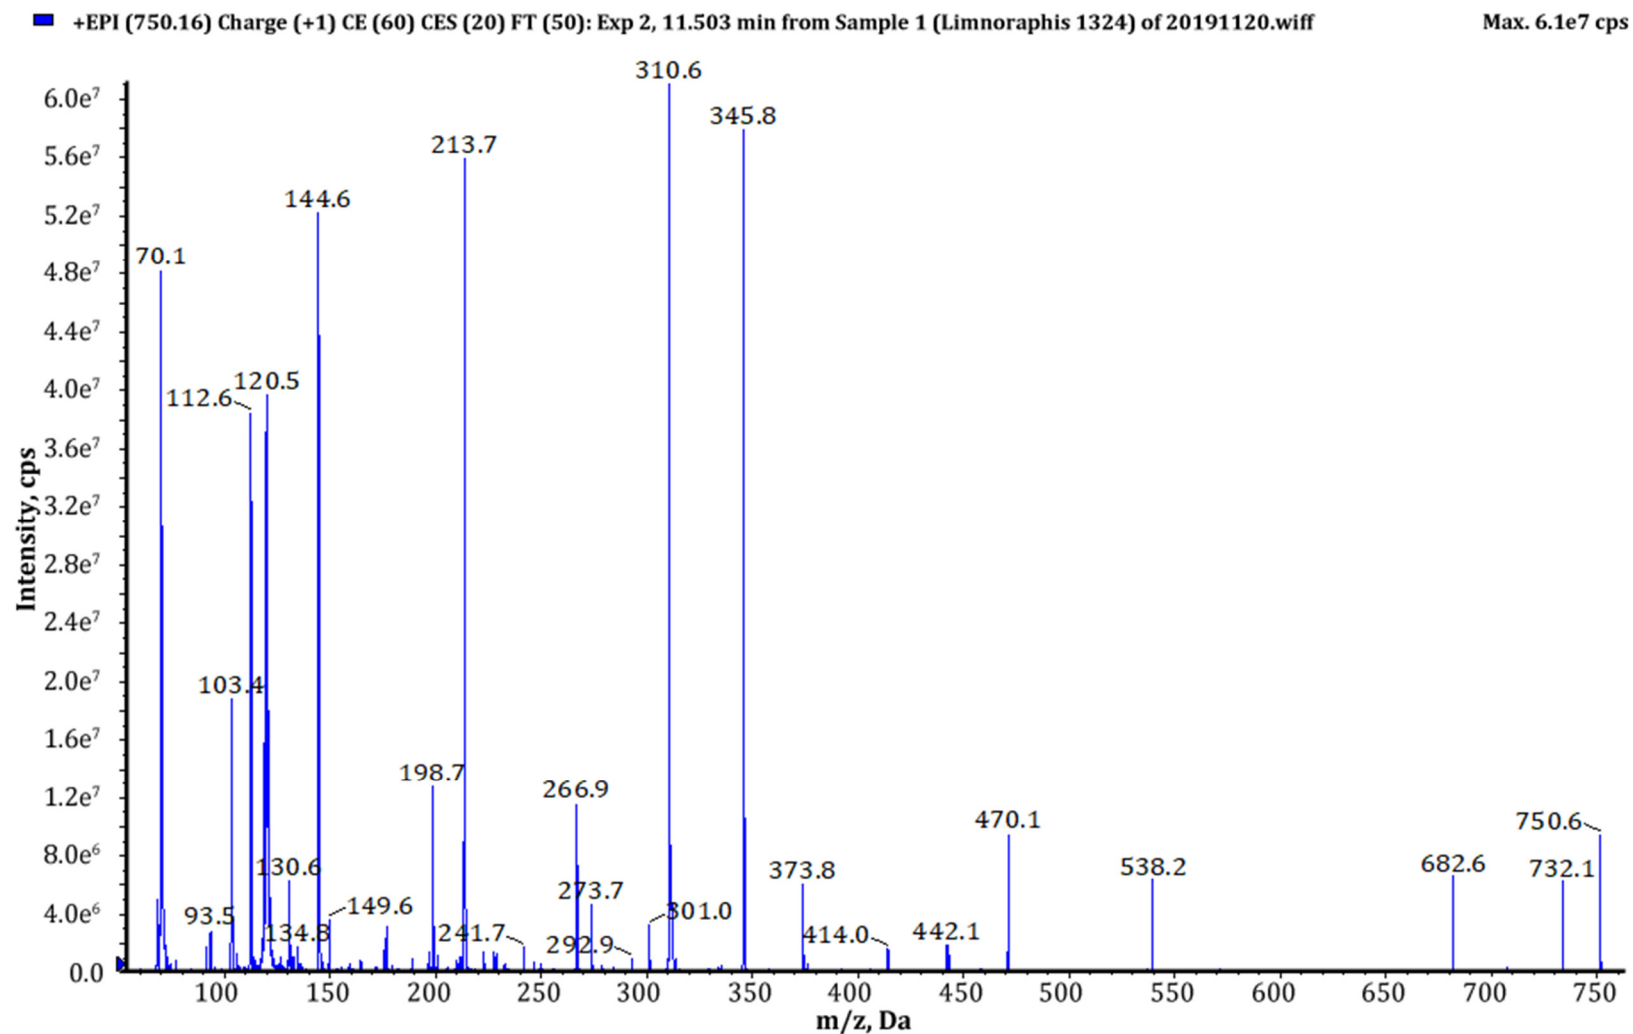

**Figure S13.** Enhanced product ion mass spectrum of aeruginosamide AER749 with general structure Pre+225+Phe+Pro+Pro+TzlCOOMe identified based on the following fragment ions: 750 [M+H], 732 [M+H-H<sub>2</sub>O], 538 [M+H-(Pyr+TzlCOOMe)], 470 [225+Phe+Pro+H], 442 [225+Phe+Pro+H-CO], 373 [225+Phe+H], 345 [225+Phe+H-CO], 310 [Pro+Pyr+TzlCOOMe+H], 266 [Pre+225+H-CO], 213 [Pyr+TzlCOOMe+H], 198 [225+H-CO], 144 [TzlCOOMe], 120 Phe immonium ion, 112 TzlCO, 70 Pro immonium ion.

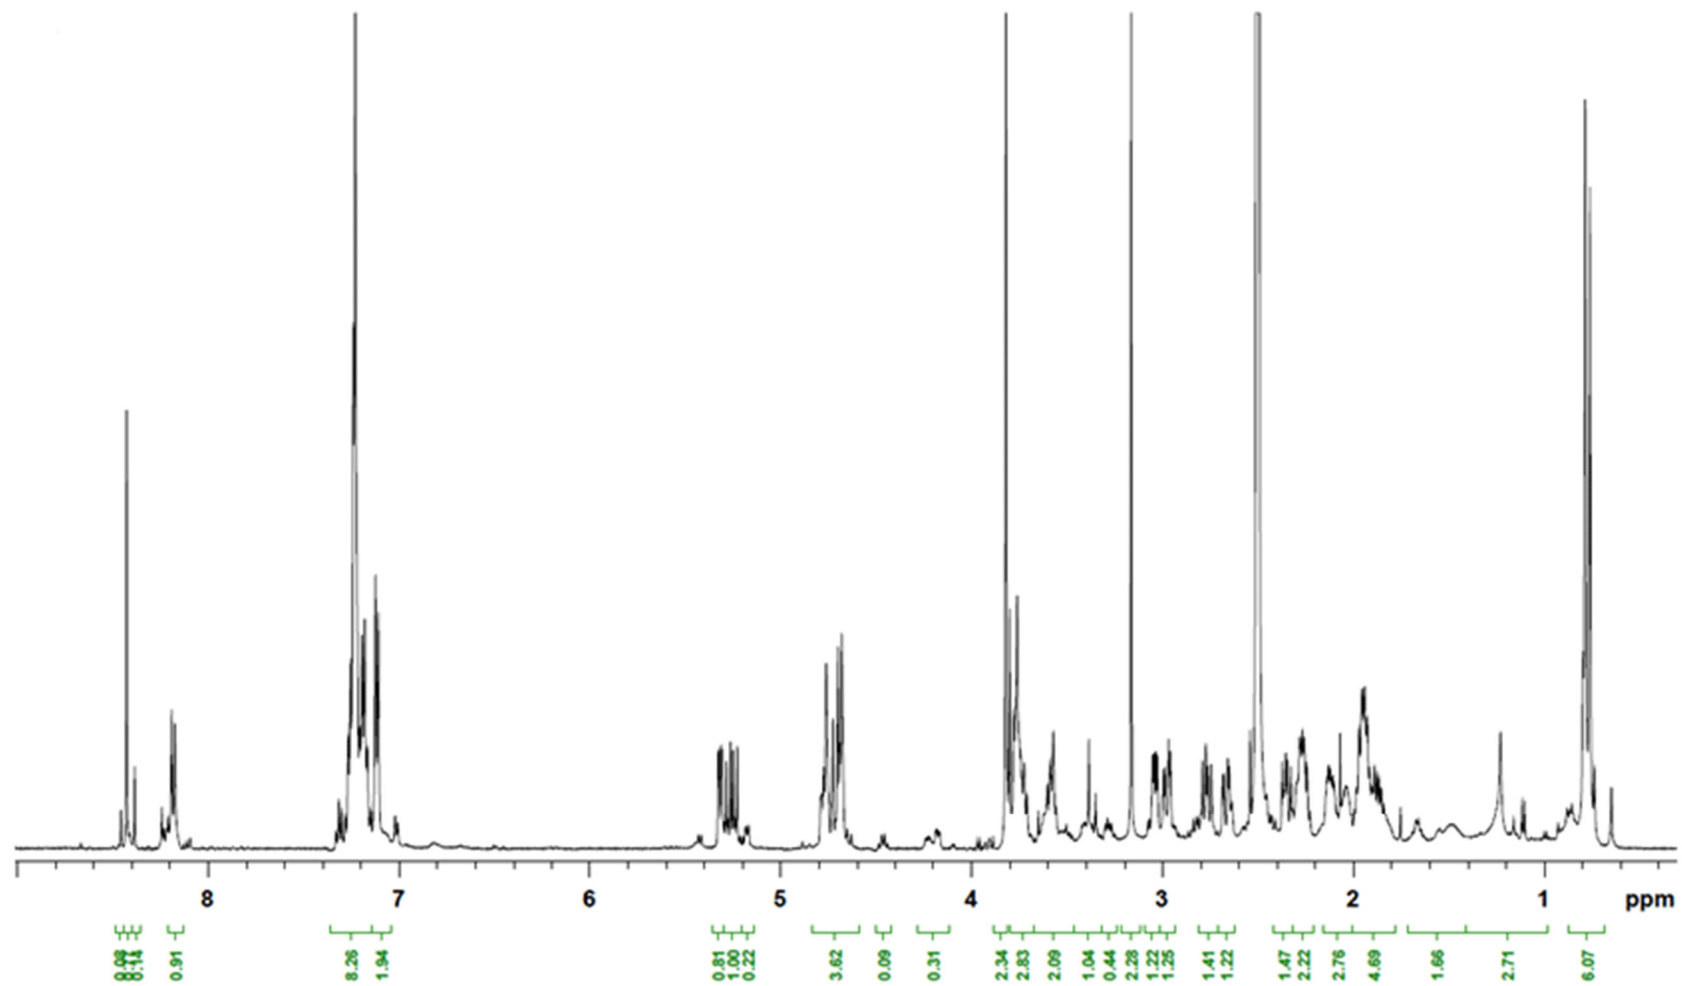

Figure 14. <sup>1</sup>H NMR Spectrum of aeruginosamide AEG671 in DMSO-d<sub>6</sub>.

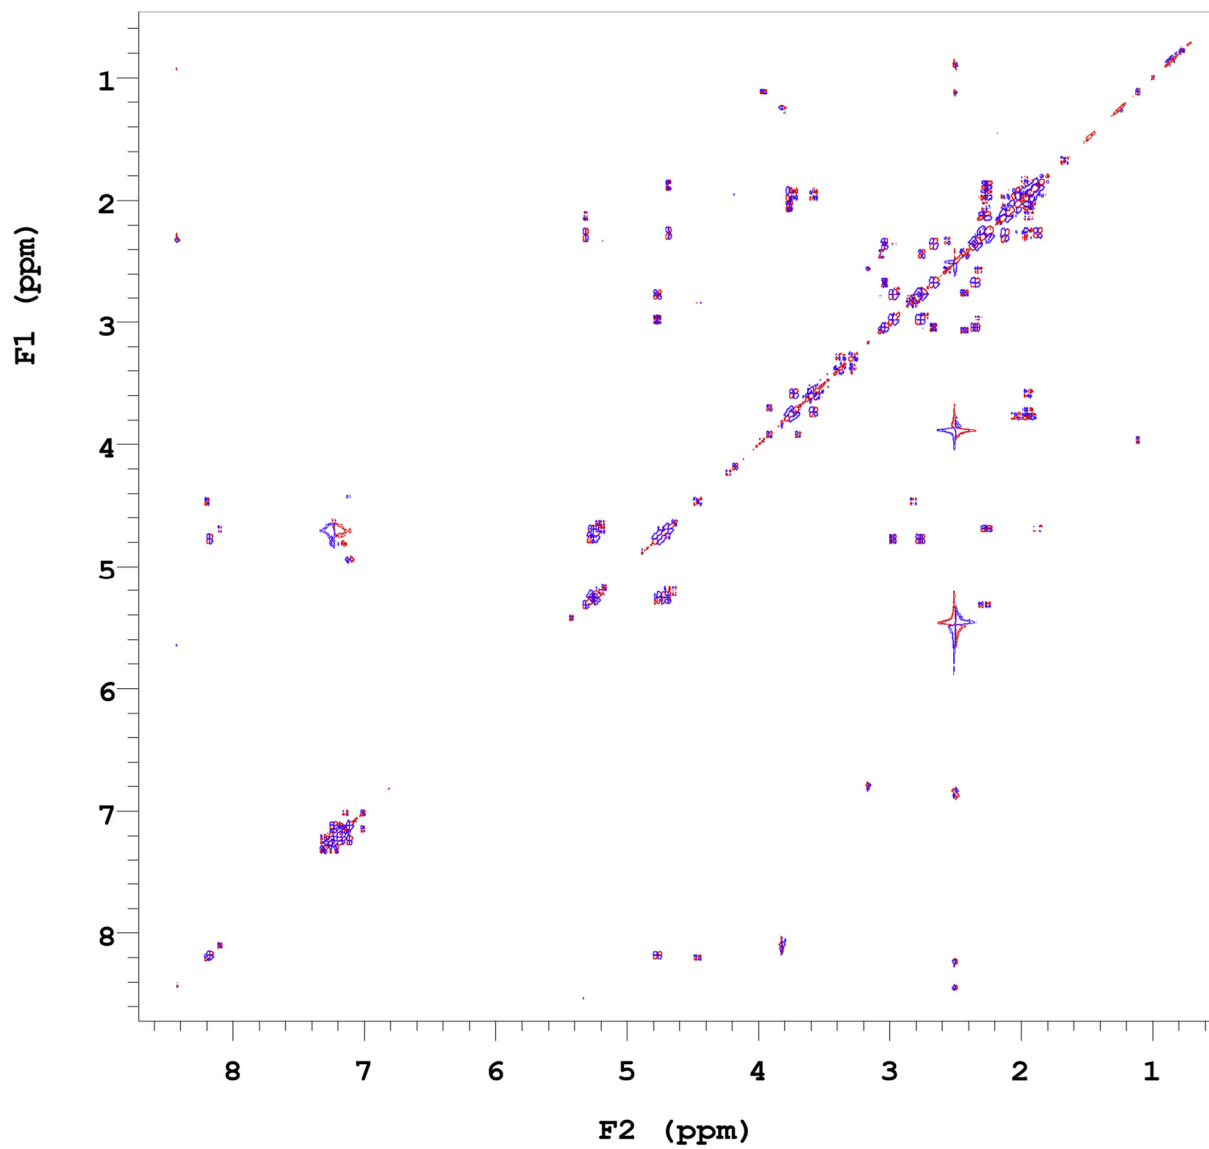

Figure 15. COSY Spectrum of aeruginosamide AEG671 in DMSO-d<sub>6</sub>.



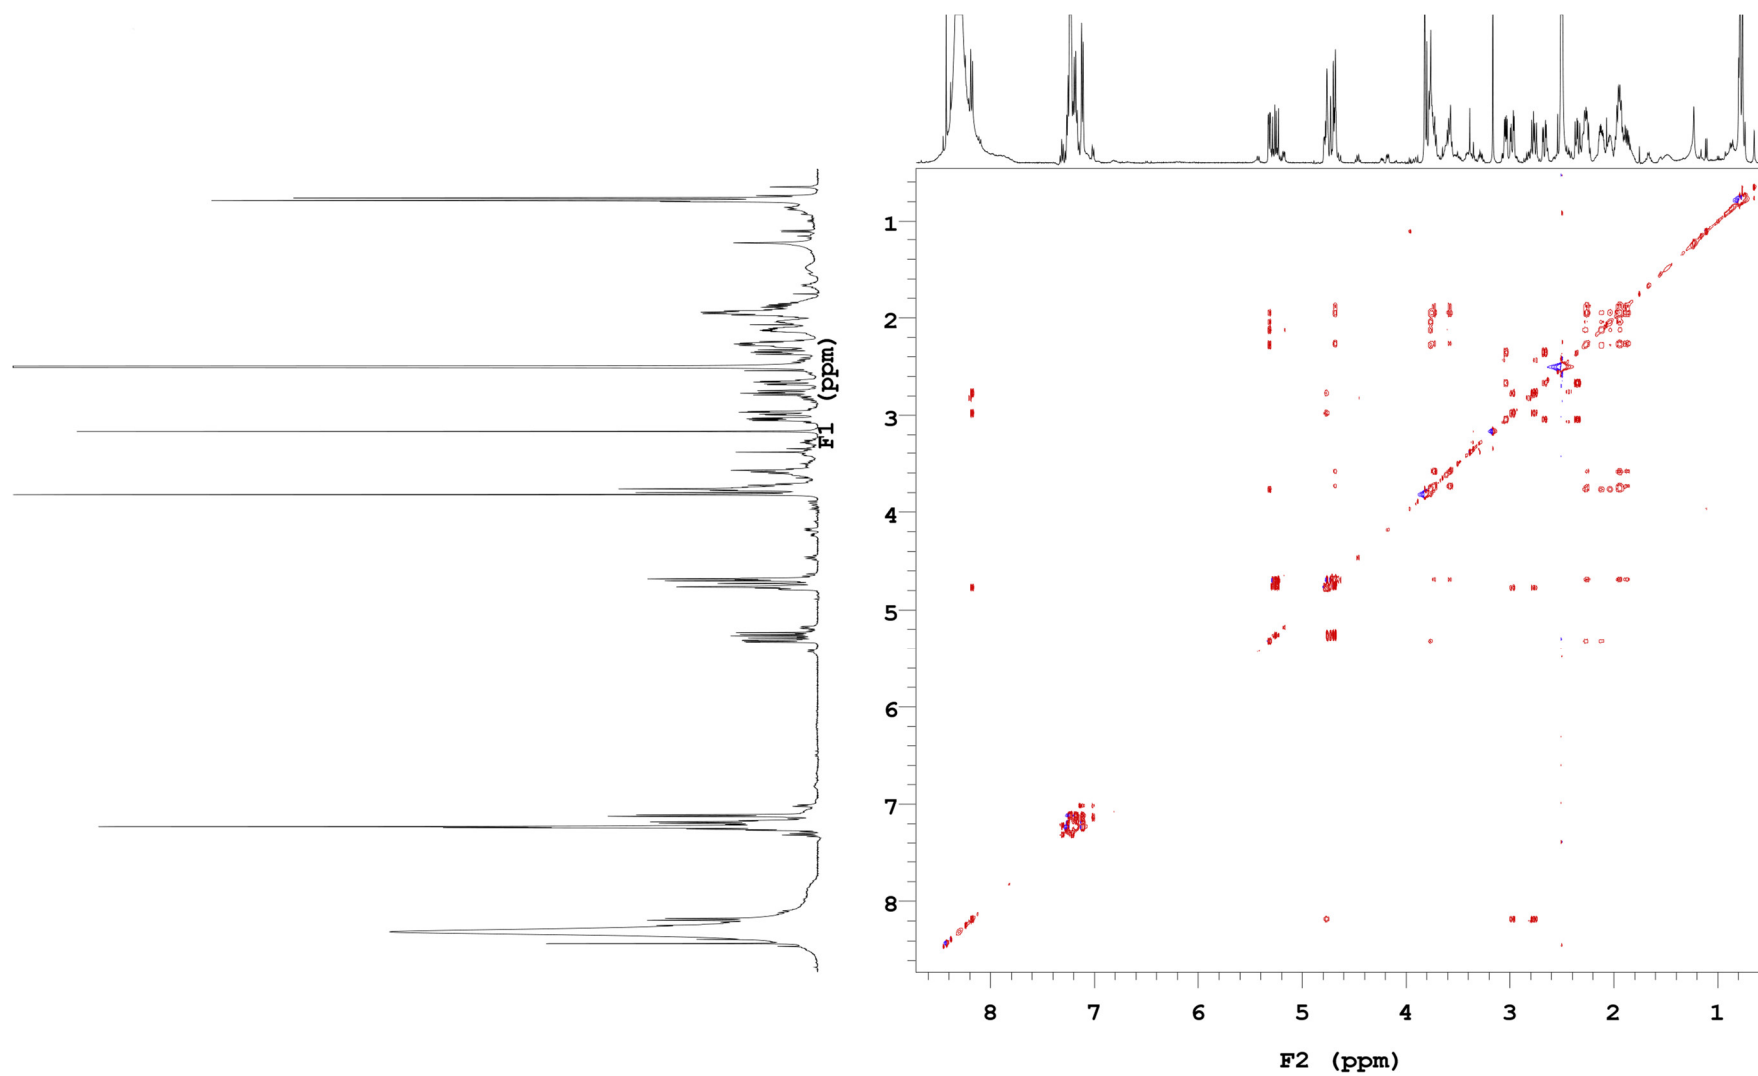

Figure 16. TOCSY Spectrum of aeruginosamide AEG671 in DMSO-d<sub>6</sub>.

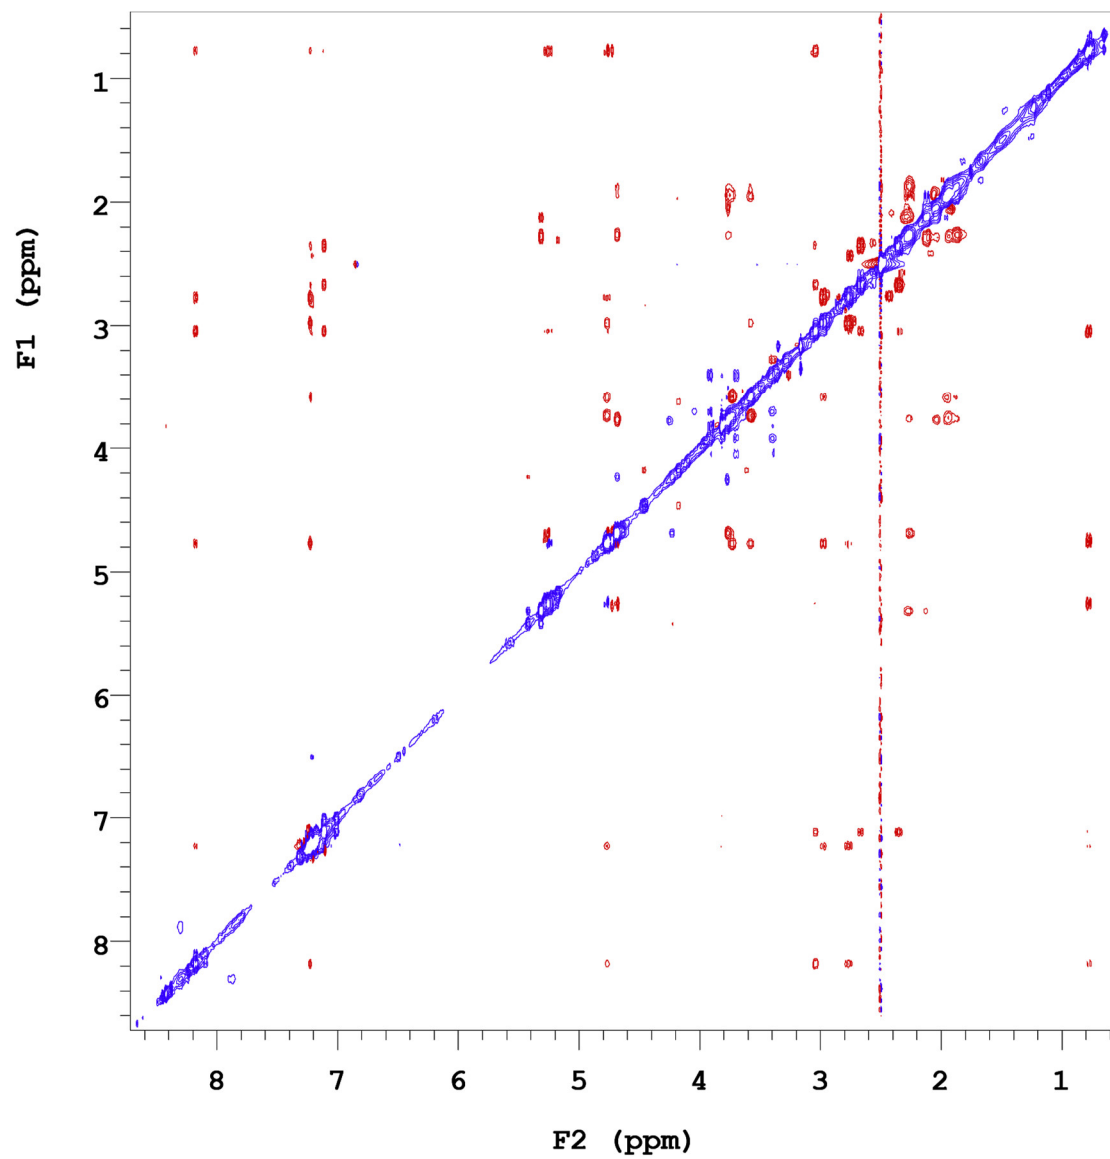

Figure 17. ROESY Spectrum of aeruginosamide AEG671 in DMSO-d<sub>6</sub>.

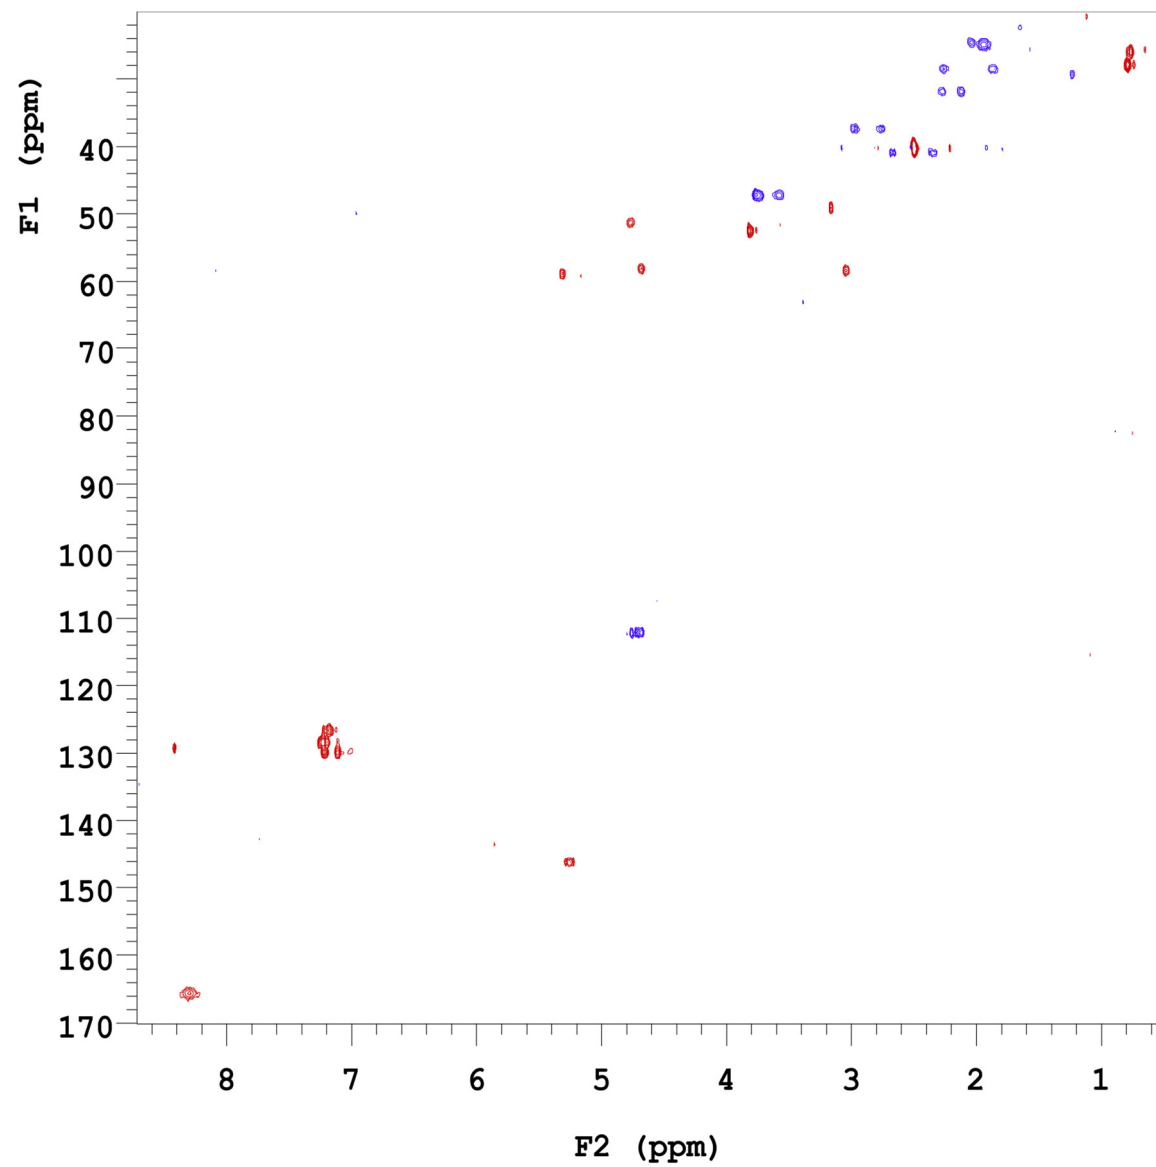

Figure 18. HSQC Spectrum of aeruginosamide AEG671 in DMSO-d<sub>6</sub>.

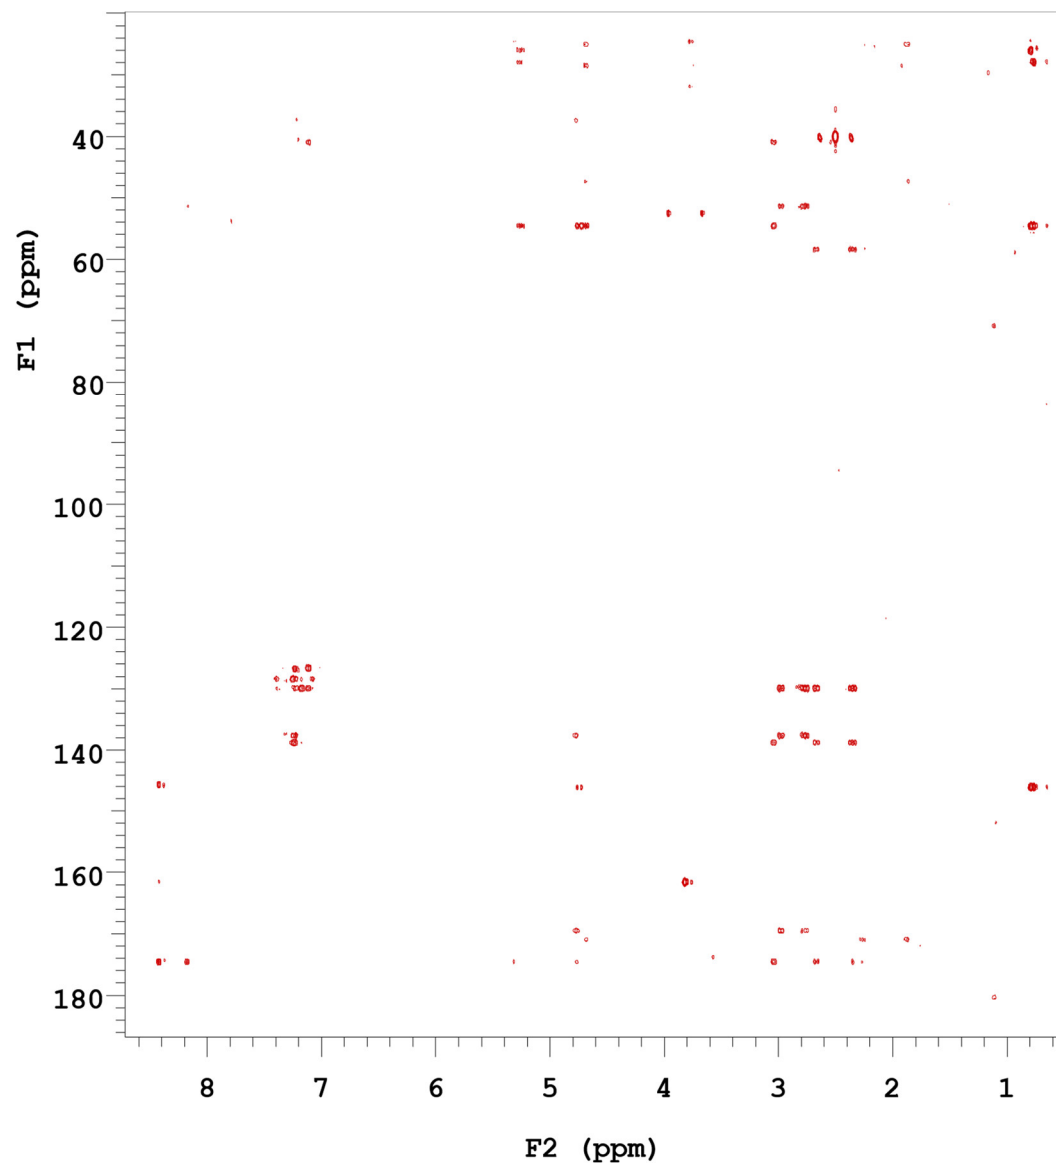

Figure 19. HMBC Spectrum of aeruginosamide AEG671 in DMSO-d<sub>6</sub>.

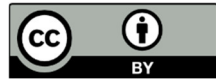

© 2020 by the authors. Licensee MDPI, Basel, Switzerland. This article is an open access article distributed under the terms and conditions of the Creative Commons Attribution (CC BY) license (<http://creativecommons.org/licenses/by/4.0/>).
